# Supplementary material
Source: publisher site journal article supplement (http://kjim.org/upload/media/kjim-2022-396-Supplementary-Fig-6.pdf)
Supplement: Supplementary file 1 [file kjim-2022-396-Supplementary-Fig-6.pdf]

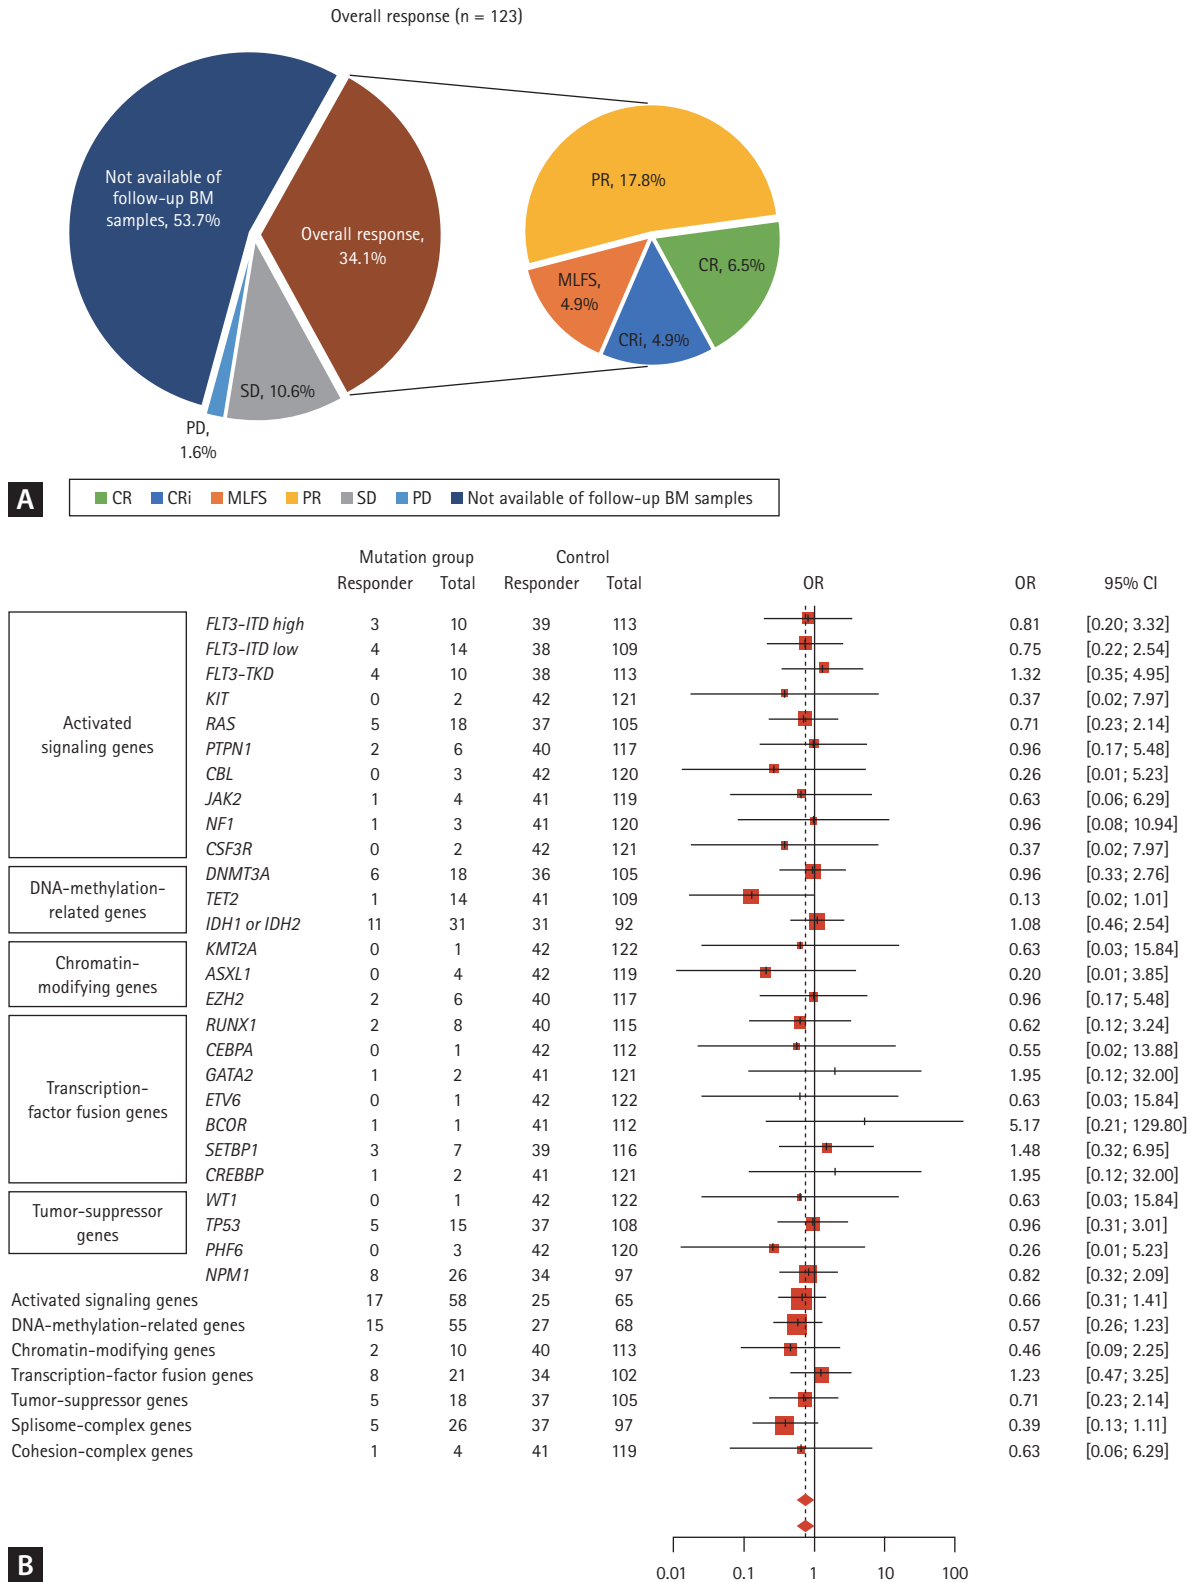

**Supplementary Figure 6.** Overall response in entire cohort (n = 123), (A) pie graph of overall response rates. (B) Gene mutations at diagnosis in elderly AML patients. Forest plots show the odds ratios (ORs, the solid squarress) of overall response with 95% confidence intervals (CIs) for each gene mutation. BM, bone marrow; PD, progressive disease; SD, stable disease; PR, partial remission; MLFS, morphological leukemia-free state; CR, complete remission; CRi, CR with incomplete hematologic recovery.
